# Supplementary material for: Glacier Image Velocimetry: an open-source toolbox for easy andrapid calculation of high-resolution glacier-velocity fields
Source: Copernicus journal article supplement (doi:10.5194/tc-2020-204), 2020-07-31
Supplement: Supplementary file [file tc-2020-204-AC1-supplement.pdf]

# Glacier Image Velocimetry: an open-source toolbox for easy and rapid calculation of high-resolution glacier-velocity fields

Maximillian Van Wyk de Vries<sup>1,2</sup> and Andrew D. Wickert<sup>1,2</sup>

<sup>1</sup>Department of Earth & Environmental Sciences, University of Minnesota, Minneapolis, MN

<sup>2</sup>Saint Anthony Falls Laboratory, University of Minnesota, Minneapolis, MN

**Correspondence:** Maximillian Van Wyk de Vries (vanwy048@umn.edu)

## Final response - Review 1

Editor comments are given in *italic*, responses in regular font.

5 *The study describes a new ice-velocity mapping toolkit using visible – near-infrared image pairs or multiple images spanning a range of time. The authors have applied several well-used and a few clever filtering and information-extraction methods in the toolkit. It is good to have one software package that provides both the vectors and a thorough means of editing them in one workflow. The authors then demonstrate the value of the velocity mapping with a group of case studies spanning the range of glacier and small ice cap environments in the northern hemisphere and a tropical location.*

10 *This is a well-written paper, and the method seems sound and very useful, although there are several similar tools available at this time. This should be published with minor revisions. The only major change I suggest is removing the ice thickness estimation and place it in another paper with other similar targets so that the calculations will be more visible to the community. It is not necessary to place it in this method-and validation paper. I make several significant suggestions for the abstract as well, and many further suggestions in the rest of the text.*

15

We thank Dr. Ted Scambos for the positive comments about the method and manuscript, as well as the useful suggestions.

We have made several key changes to the manuscript based on the recommendations in this review, in particular:

1. We added a number of key references.
2. We rewrote of the abstract based on your suggestions.
- 20 3. We removed the section on ice thickness inversion, which will be developed into its own manuscript (see detailed comments below)
4. We edited our figures for clarity.

*In general, references should be listed in time order, from earliest publication date to most recent. Adopting this convention will mean several minor changes in the manuscript.*

We have verified that all references are now listed in chronological order.

*Suggested changes to Abstract: We present ‘Glacier Image Velocimetry’ (GIV), an open-source and easy-to-use software toolkit for rapidly calculating high spatial resolution glacier-velocity fields. Glacier ice velocity fields reveal their flow dynamics, ice flux stability, and (with additional data and modelling) ice thickness. Obtaining glacier velocity measurements over wide areas with field techniques is labour intensive, and often a safety risk. Recent increased availability of high-resolution, short-repeat-time optical imagery allow us to obtain ice displacement fields using ‘feature tracking’ based on the presence of persistent irregularities on the ice surface, and hence, velocity over time. GIV is fully parallelized, and automatically detects, filters, and extracts velocities from large datasets of images. Through this coupled toolchain and an easy-to-use GUI, GIV can rapidly analyze hundreds to thousands of image pairs, requiring only a moderately high-end laptop or desktop computer. We present four examples of how the GIV toolkit may be used: to complement a glaciology field campaign (Glaciar Perito Moreno, Argentina), calculate the velocity fields of small (Glacier d’Argentière, France) and very large (Vavilov ice cap, Russia) glaciers, and determine the ice volume present within a tropical ice cap (Volcán Chimborazo, Ecuador). Fully commented code and a standalone app for GIV are available from GitHub and Zenodo.*

40

We are very grateful for this re-write of our abstract, and adopt it with a few minor changes (in particular to reflect the removal of the ice thickness/volume calculations).

*Consider adding these very pertinent additional references in the introduction Line 20-21 : Howat, I.M., Porter, C., Smith, B.E., Noh, M.J. and Morin, P., 2019. The Reference Elevation Model of Antarctica. Cryosphere, 13(2), <https://doi.org/10.5194/tc-13-665-2019> Scambos, T.A., Haran, T.M., Fahnestock, M.A., Painter, T.H. and Bohlander, J., 2007. MODIS-based Mosaic of Antarctica (MOA) data sets: Continent wide surface morphology and snow grain size. Remt. Sens. Env., 111(2-3),242-257, <https://doi.org/10.1016/j.rse.2006.12.020>. Line 32: Stearns, L.A., Smith, B.E. and Hamilton, G.S., 2008. Increased flow speed on a large East Antarctic outlet glacier caused by subglacial floods. Nature Geoscience, 1(12), 827-831, [://doi.org/10.1038/ngeo356](https://doi.org/10.1038/ngeo356). Line 42: Bindschadler, R.A. and Scambos, T.A., 1991. Satellite-image-derived velocity field of an Antarctic ice stream. Science, 252(5003), 242-246, <https://doi.org/10.1126/science.252.5003.242>. Line 47: Fahnestock, M., Scambos, T., Moon, T., Gardner, A., Haran, T. and Klinger, M., 2016. Rapid large-area mapping of ice flow using Landsat 8. Remt. Sens. Env., 185, 84-94, <https://doi.org/10.1016/j.rse.2015.11.023>.*

55 We agree that these references provide important background information, and have added them to our introduction.

*Line 52: you may want to note these two data sites, presenting already-processed data – <https://nsidc.org/data/golive> <https://nsidc.org/apps/itslive/>*

60 We have added a one sentence description of these datasets, as they are likely of interest to the readers of this paper (and may be a viable substitute for running GIV over large regions, and where lower spatial and temporal resolution are acceptable).

*Table 1: PyCorr is the tool behind Fahnestock et al., 2016, which produced some of the mosaics in Gardner et al., 2018.*

65 We have add PyCorr to the table, along with 3 other tools that were flagged by reviewer 2 (Pointcatcher, PyTrx and EMT). We have also added a sentence to the table description to highlight that our list is not exhaustive. We were unable to locate a copy of PyCorr software on the internet (although it is mentioned in several papers, as you have highlighted), and are unsure if it is available for use by other teams.

70 *Line 117 – you say ‘multipass methods take advantage of the reduction in chip size to improve the signal to noise’. I think this needs to be rephrased – in general, if there is low shear or deformation across the scene, large chip sizes produce much better matches.*

We have expanded and clarified the benefits of multipass methods in the following sentences: "Multi-pass methods refine  
75 displacement estimates in multiple iterations, refining initial coarse window size displacement calculations with progressively smaller window sizes. Multi-pass methods combine the advantages of better feature matching at large window sizes with the higher spatial resolution of small window sizes. Both methods are integrated into GIV, which uses a 3 iteration multi-pass algorithm."

We have also added a reference in the methods section to a recent PhD thesis by Dr. Bas Altena (2018), which provides a  
80 well written and detailed background on some of the common processing steps in glacier feature tracking.

*Line 150 – at what ‘scale’ or number of grid cells are these statistical values calculated? I would assume this scale is either set by the user or by some extracted geography of the ice within the image pair(s).*

85 The statistical values are calculated for a single cell, averaged through time. For clarity, the sentence was changed to : "Secondly, GIV calculates the mean, standard deviation, median, minimum, and maximum velocities through time at each grid cell in the dataset."

*Figure 5 – label the color bars, with ‘Flow Speed’ and ‘Bearing... Could also add degree symbols to the bearing indices,*

90

The recommended changes have been made.

*Figure 7 – the perspective view is a bit difficult to follow without somewhat more area covered to gain a feel for the 3-dimensional structure... The figure is nice but takes a while to orient mentally. Expand view, or, a second inset that shows the*

95 *map view?*

This figure has been edited to include a second inset showing the full-glacier velocities in map view. The color scheme has also been changed (from <https://colorbrewer2.org/>) in order to be 1) suitable for converting to black and white and 2) color-blind friendly, as recommended by the editor.

100

*Figure 8 – Expand the velocity scale (taller) in one of the top two insets, and no need to repeat it in both (a) and (b). The titles of (a) and (b) should be ‘ice speed’ unless you include a few vectors for direction. Include the month of the velocity mapping in the ‘title’ of the insets for (a) and (b).*

105 The velocity scale has been expanded, labelled as ‘Flow speed (m/yr)’, and is no longer duplicated. The velocity maps are full yearly averages (well, March-September due to the Arctic winter), and so do not correspond to a specific month. They have been labelled as yearly averages.

*Line 263 – suggest change to ‘...or ice basal conditions are identified.’*

110

The recommended change has been made.

*Figure 9 – What is the difference, exactly? GIV minus Zheng or Zheng minus GIV?. The scale of the speed differences is large for the margins, and appears to be locally consistent. However it does not extend outside of the glacier boundaries, so it would seem that its not due to a rotational mis-registration. It would seem that somehow the two mappings captured a true physical shift in the margins or speed profile across Vavilov during May 2017 somehow.*

115

We have edited the figure caption to clarify the difference map, it now reads: "a) shows a difference map, corresponding to Zheng et al. velocity minus GIV velocity"

120 We have also been in touch with the creator of the Vavilov velocity maps (Whyjay Zheng) and it indeed seems likely that the difference may be resolving a real shift in margin position and/or velocity over time. It is relevant to note that a project comparing results from GIV and other feature tracking tools (including Zheng et al’s CARST) to glacier GPS data is ongoing.

*Lines 268-269 – Was geolocation necessary? Landat 8 geolocation is generally within 5 meters, i.e. significantly less than a panchromatic band pixel; Sentinel-2 image geolocation is similar. What was the scale of the error in geolocation that you corrected?*

125

Geolocation shift was small, on the order of half a velocity pixel to one velocity pixel (~50-100m). GIV velocities were derived from non-georeferenced imagery (.jpg) and georeferenced based on corner coordinates, which likely contributed to the

130 mis-match. An option to run GIV directly on geotiff images has since been added.

*Line 272 – remove ‘total’, makes it sound like you are summing the velocities... note also, it’s speed, not velocity: velocity is a vector.*

135 The recommended change has been made, and ‘velocity’ changed to ‘speed’ where referring to the magnitude only.

*Line 290 – please provide the lat long for Chimborazo, and for the other sites (sorry if I missed it).*

The coordinates of all locations have been added.

140

*Line 295 – change to ‘...but for this single point (which we use for benchmarking our method), combined with...’*

*Lines 306 – 316: Hmm. Do you not have a thermal profile from the 54 meter core to the base? It is very likely that the base of the ice is warmer than the air-temperature-based isotherm because of insulation. Moreover, the presence of water-logged ice (a firn aquifer) means that it is likely that water drains to the bed – and further, you note that the glacier supplies water to the local watershed so seasonal melting is significant (and in general, meltwater on a glacier finds its way through the ice and to the ice-bedrock interface, warming the bedrock.*

145

We agree with these comments, and will bear them in mind when further developing the ice thickness inversion work. In the meanwhile, the associated lines have been removed from the manuscript.

150

*Rather than take on this complex mountain glacier, why not apply your method to the Vavilov Ice Cap outside of the area of sudden rapid flow? Or you might try a glacier where it is more certain that <0C conditions exist at the bed, and with more validation data – Commonwealth Glacier or Canada Glacier in the Dry Valleys would be good.*

155

*More generally — this paper does not need this section on thickness estimation – your point is to show off the quality and extent and usefulness of the GIV data, and the extensive processing and filtering steps you take – and while this is a demonstration of ‘usefulness’, it’s better as a stand-alone study of Chamborazo or a small set of glaciers where the result will not be lost in the literature (no one will find your thickness estimate in this paper). A series of ice thickness estimates for cold-based Andean glaciers, or Dry Valley glaciers, or selected Himalayan glaciers, using GIV, would be cited extensively.*

160

Since the submission of this manuscript we have run variations of this methodology on 6 additional tropical ice caps in Ecuador and Colombia, including some glaciers with better ground-penetrating radar derived ice thickness constraints. Following your suggestions, we crop out the discussion about inverting for ice thickness, and will place this in a separate paper with more

165 space for discussing the inversion parameters and model-data comparison. We have kept the Chimborazo ice velocity results in this paper, as we feel it is a useful example of using GIV at small and slow-moving glaciers.

*Line 322 – re-write, confusing. Maybe you mean: local -basal- stresses induced by the ice are much greater than lateral stresses between columns of ice...?*

170

*Line 340 – 3090 Sentinel -2 image pairs in 2 hours on a Dell laptop – did you subset the Sentinel-2 to just cover the Chimborazo summit area? I am also surprised there are that many pairs – you might include a statement as to how many distinct images were processed.*

175 This sentence has been edited for clarity. There are 91 unique images, which are cropped to the region surrounding Chimborazo (with enough bare rock to enable the stable ground correction) and paired up into all possible pairs with >6 months separation. In theory there are  $(n^2-n)/2$  possible image pairs, or 4095 total image pairs in this case (and around 1000 images pairs are excluded due to a separation of <6 months).

180 *Lines 344-355 – There is no need for all this speculation on your ice thickness estimate in this paper – this belongs in a separate paper where the approach can be developed more and applied to a set of related areas (perhaps). I strongly suggest cutting this ice thickness section out and placing it in a separate paper. I think it might be interesting to apply GIV to an ice sheet region such as Nimrod Glacier or Peterman Glacier.*

185 As mentioned above, we have limited the Chimborazo section to the calculation of ice velocities and will develop the thickness inversion methodology into a stand-alone paper. We have tested GIV on Antarctic Peninsula glaciers and portions of Thwaites glacier calving front (with no issues). Nimrod glacier appears to be an interesting case study due to its large central nunatak, and good baseline data from Stearns (2007, PhD thesis; 2011).

190 *Line 390 – change to ‘...alternative. GIV is easily learned and is not computationally time-consuming, and the results...’ Not to be harsh, but GIV itself does not learn, and doesn’t run either.*

We have corrected our sentence.

195
